# Supplementary material
Source: PubMed Central journal article supplement (PMC1829259)

A

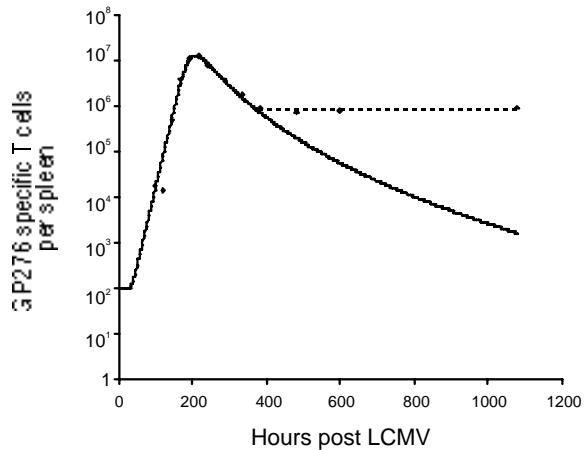

B

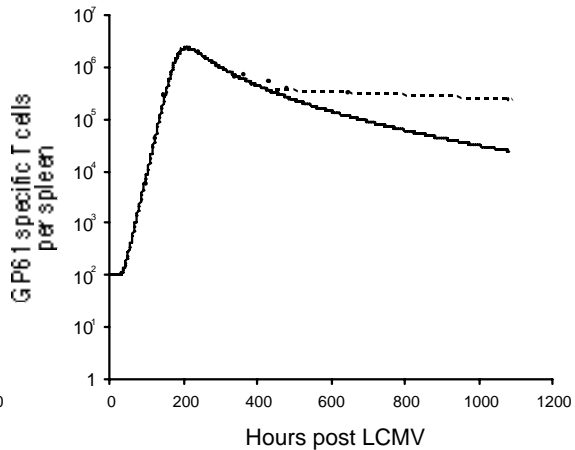

Supplement: pnas_0700026104_7.pdf [file pnas_0700026104_7.pdf]
